# Supplementary material for: Protein Complex Organization Imposes Constraints on Proteome Dysregulation in Cancer
Source: PubMed Central journal article supplement (PMC9580999; doi:10.3389/fbinf.2021.723482), 2021-08-30
Supplement: DataSheet1.pdf [file DataSheet1.pdf]

## *Supplementary Material*

**Supplementary Table 1.** Number of proteins with different stoichiometric ratios and their classification as even and uneven in each cohort.

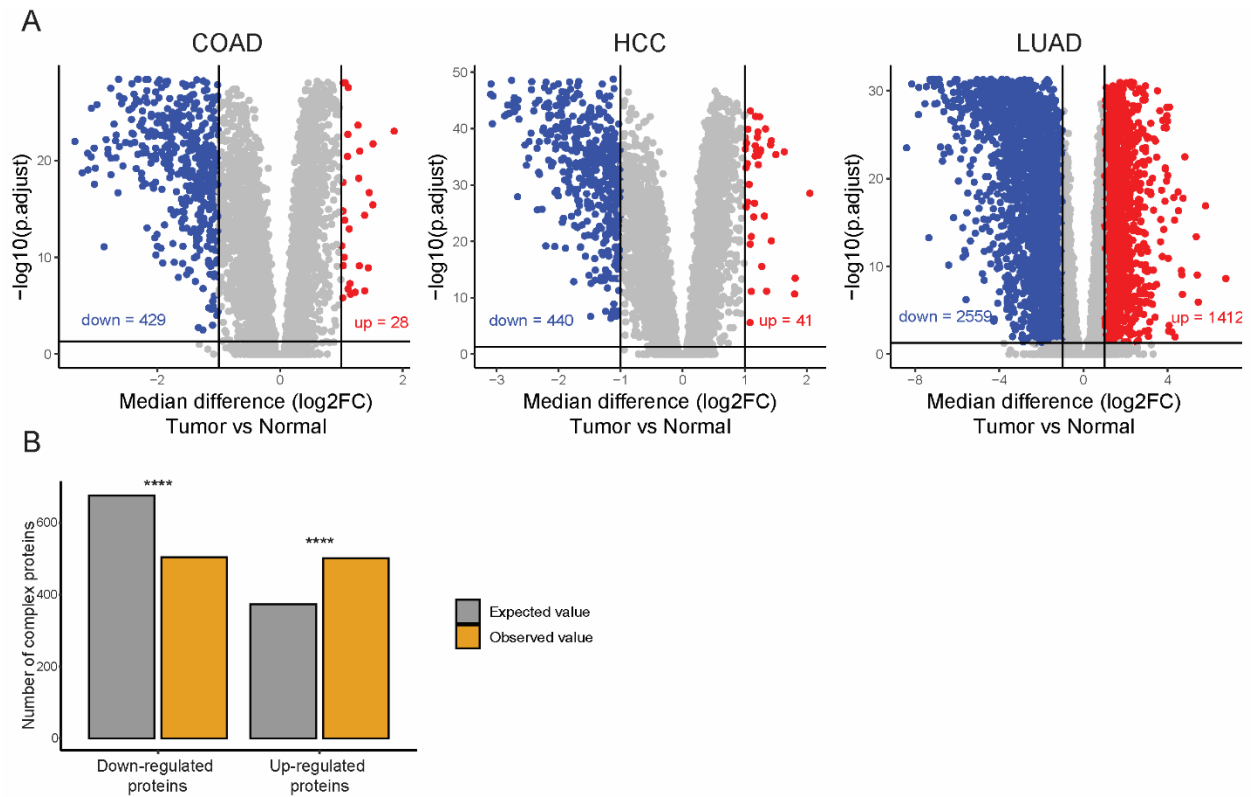

**Supplementary Figure 1. Protein abundance changes in cancer.** (A) Differential protein abundance changes in COAD, HCC and LUAD cohorts. (B) The expected and observed number of complex subunits in up- and down-regulated proteins in LUAD cancer. The chi-square test was used to determine if the difference between expected and observed values is statistically significant (\*\*\*\*:  $P < 0.0001$ ).

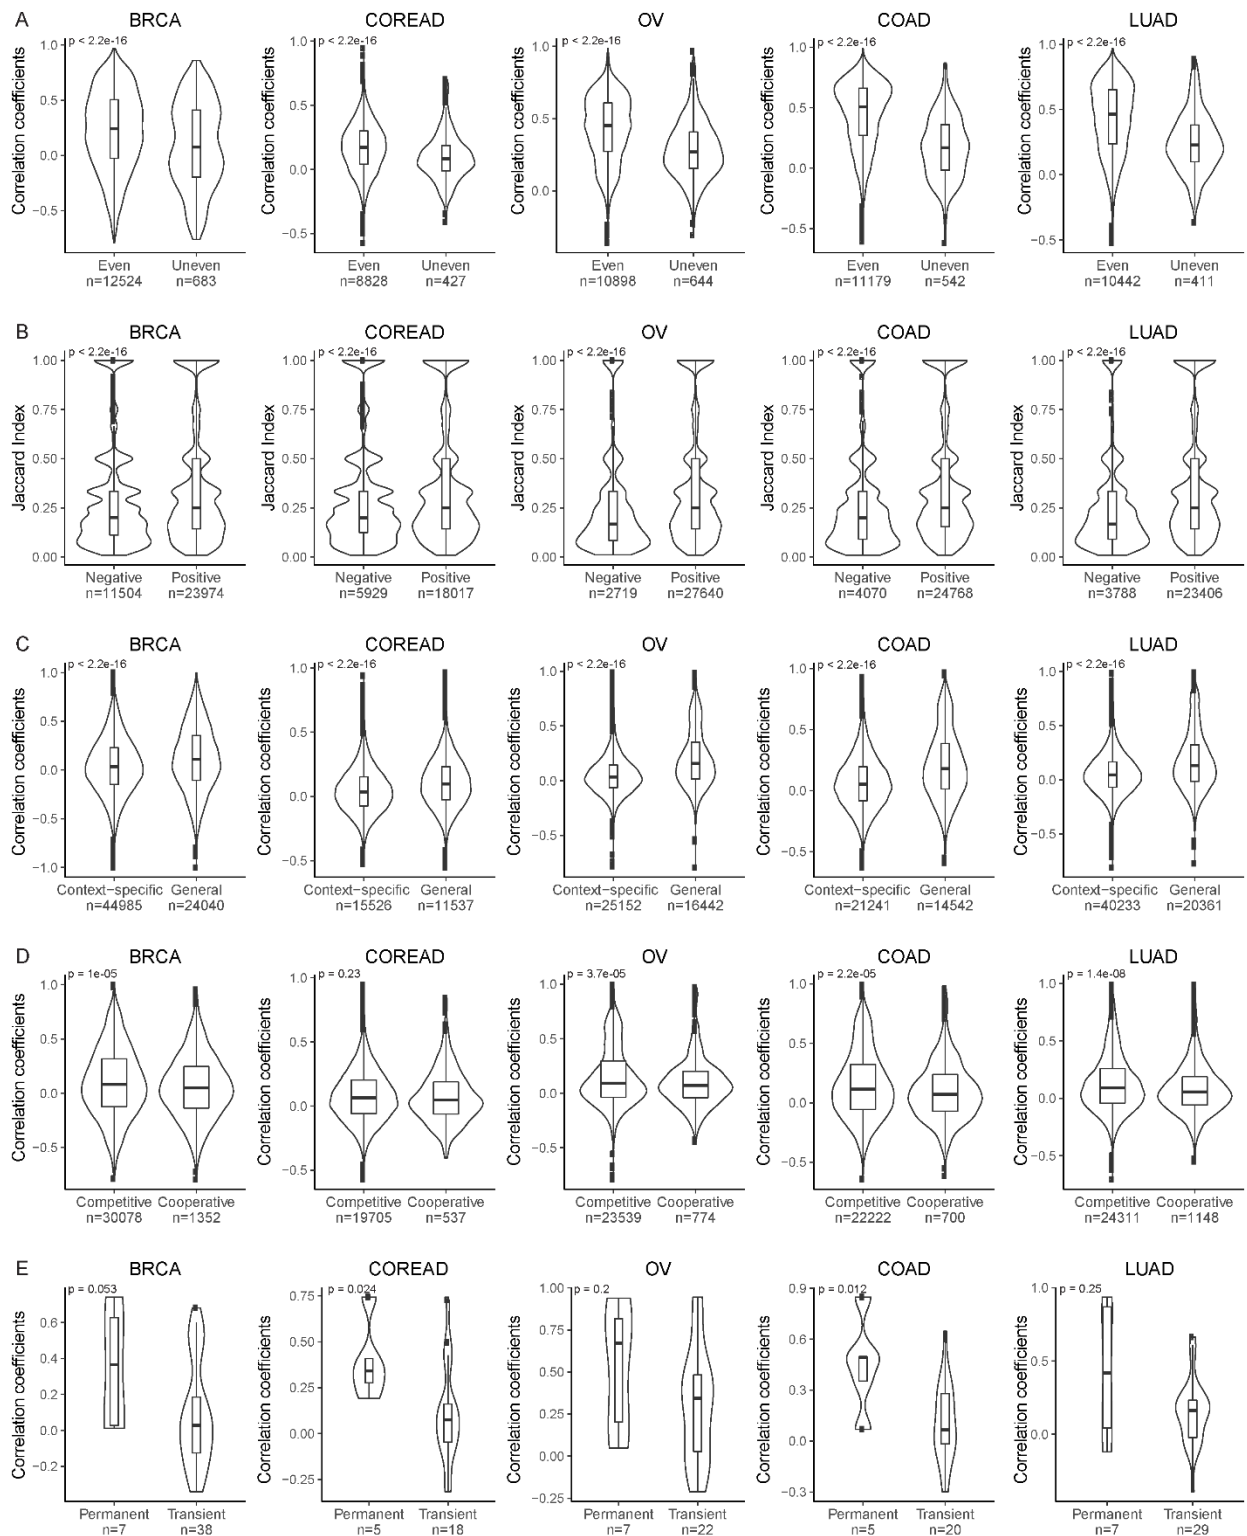

**Supplementary Figure 2. Protein-protein interaction types and protein level correlations between proteins across tumor samples for five cohorts (BRCA, COREAD, OV, COAD, LUAD). (A) Stoichiometric ratio between proteins. (B) Co-occurrence frequency of proteins. (C) Context-specific vs general interactions. (D) Competitive vs cooperative interactions. (E) Permanent vs transient interactions. Wilcoxon test was used to compare correlations between different protein interaction types.**

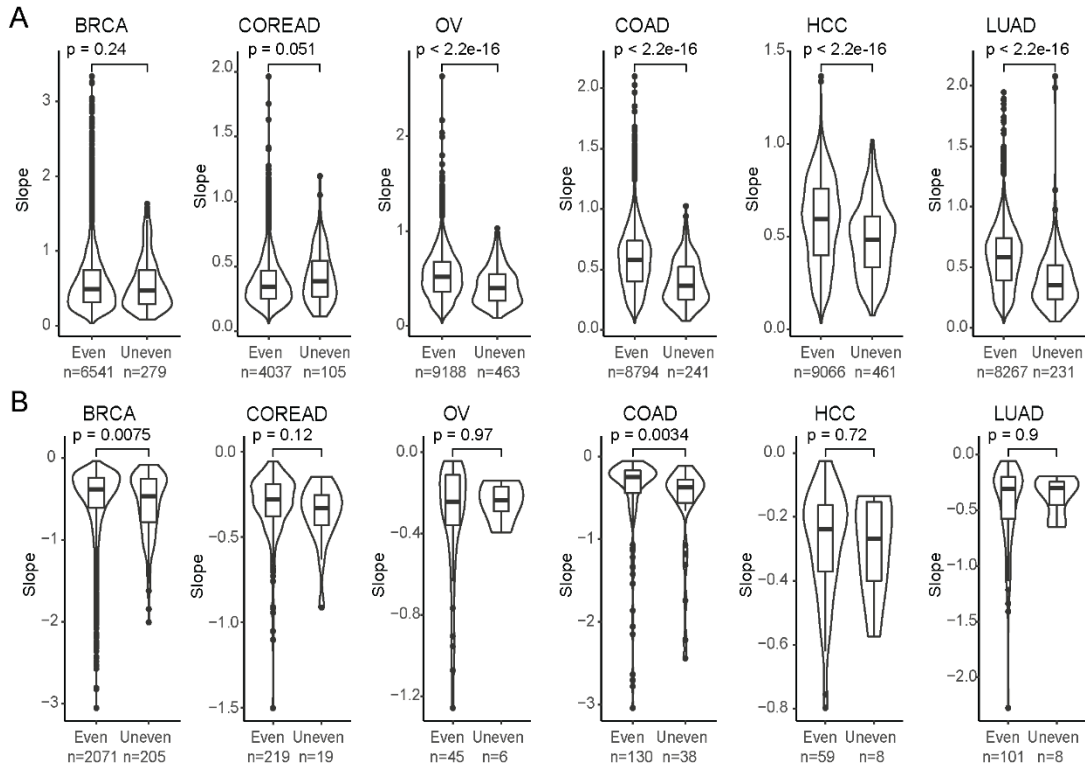

**Supplementary Figure 3. Linear regression analysis for protein abundances.** Comparison of distributions of slopes from the linear regression analysis between protein pairs with even and uneven stoichiometric ratios for each cohort (BRCA, COREAD, OV, COAD, HCC, LUAD). **(A)** Positively correlated proteins and **(B)** negatively correlated proteins. After regression analysis, only the significant results ( $p < 0.05$ , linear regression model) were considered.

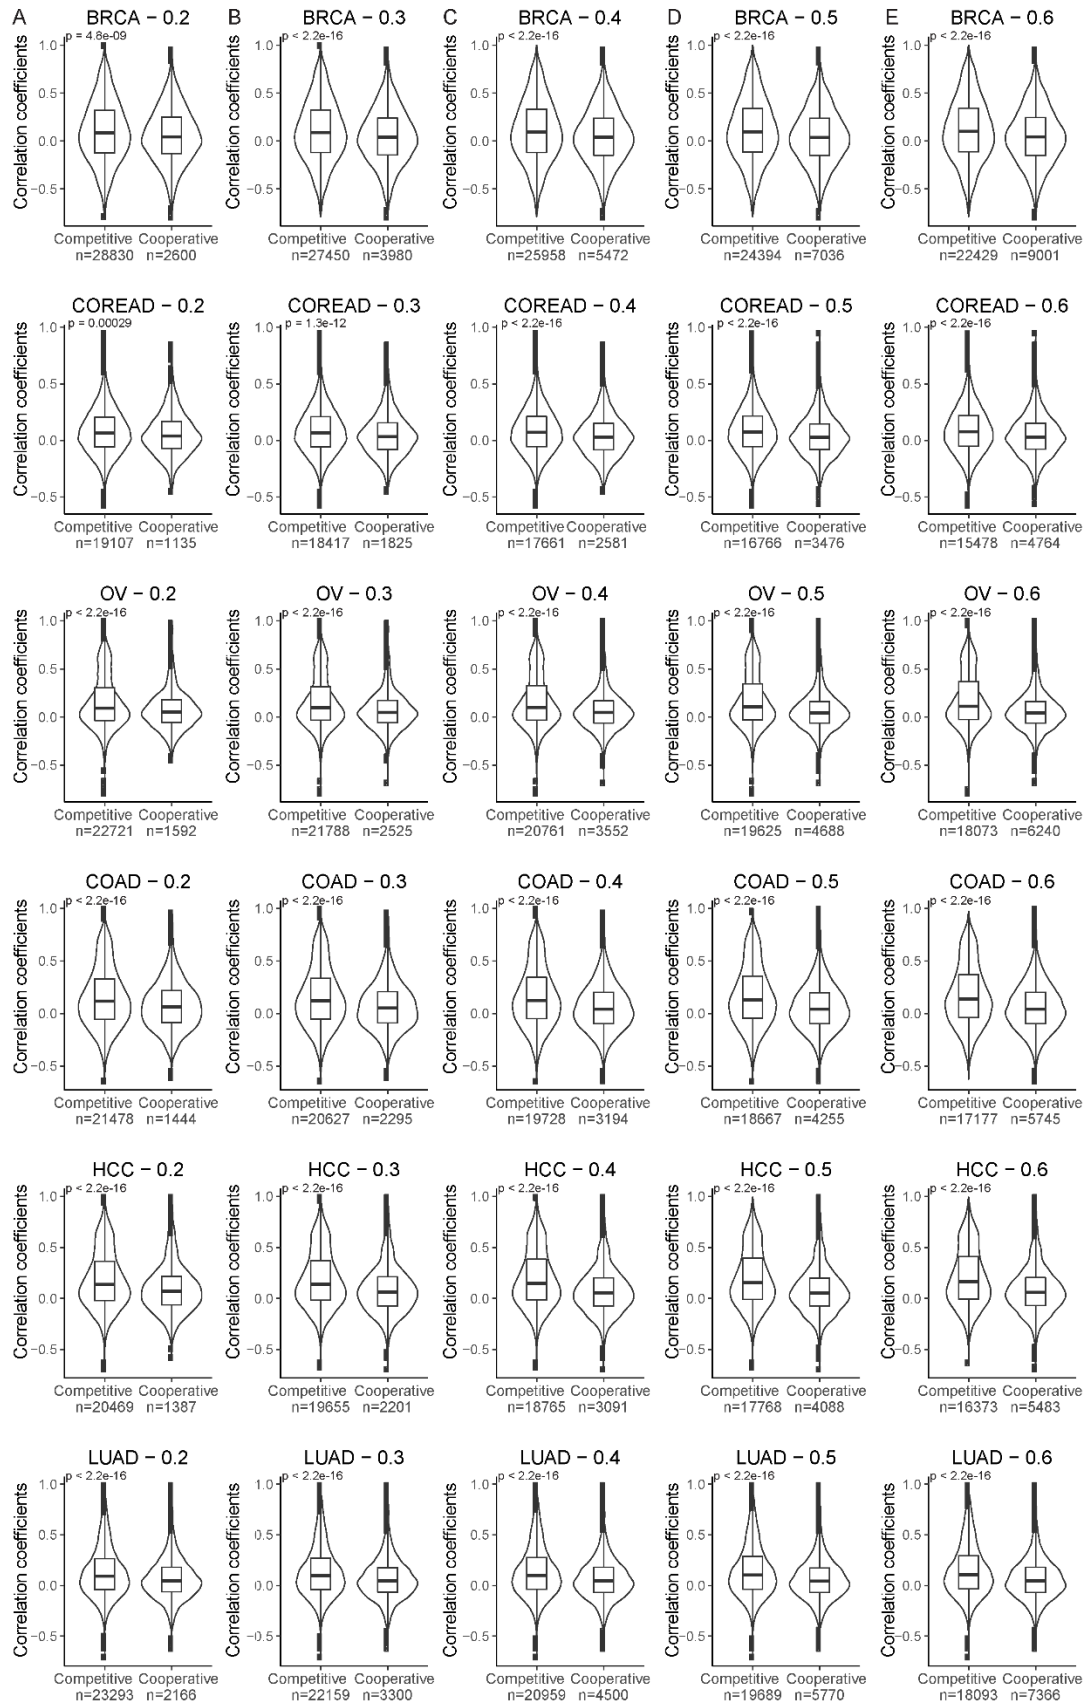

**Supplementary Figure 4. Comparison of protein abundance correlations between competitive and cooperative interactions when they were grouped based on different binding similarity score cut-offs.** Each panel shows the comparison between groups categorized based on a certain cut-off for all cohorts (BRCA, COREAD, OV, COAD, HCC, LUAD). The interaction between two proteins is competitive, if the binding similarity score is equal to or larger than **(A)** 0.2, **(B)** 0.3, **(C)** 0.4, **(D)** 0.5, and **(E)** 0.6, otherwise cooperative.
