# Supplementary material for: Protein Complex Organization Imposes Constraints on Proteome Dysregulation in Cancer
Source: Front Bioinform. 2021 Aug 30;1:723482. doi: 10.3389/fbinf.2021.723482 (PMC9580999; doi:10.3389/fbinf.2021.723482)
Supplement: Supplementary file 2 [file Table1.XLSX]

## Sheet: Stoichiometric ratios
The number of protein interactions with different stoichiometric ratio, related to Figure 2A and Supplementary Figure 2A
Cohort: LUAD					Cohort: COAD					Cohort: HCC					Cohort: BRCA					Cohort: OV					Cohort: COREAD
Total numbers: Even = 10442 and uneven = 411					Total numbers: Even = 11179 and uneven = 542					Total numbers: Even = 10042 and uneven = 532					Total numbers: Even = 12524 and uneven = 683					Total numbers: Even = 10898 and uneven = 644					Total numbers: Even = 8828 and uneven = 427
Stoichiometric.Ratio	Frequency	Annotation			Stoichiometric.Ratio	Frequency	Annotation			Stoichiometric.Ratio	Frequency	Annotation			Stoichiometric.Ratio	Frequency	Annotation			Stoichiometric.Ratio	Frequency	Annotation			Stoichiometric.Ratio	Frequency	Annotation
1:1	8629	Even			1:1	9162	Even			1:1	8087	Even			1:1	10108	Even			1:1	8838	Even			1:1	7031	Even
1:1;2:2	665	Even			1:1;2:2	770	Even			1:1;2:2	805	Even			1:1;2:2	876	Even			1:1;2:2	773	Even			1:1;2:2	694	Even
1:1;6:6	497	Even			1:1;6:6	529	Even			1:1;6:6	466	Even			1:1;6:6	562	Even			1:1;6:6	529	Even			1:1;6:6	497	Even
2:2	293	Even			2:2	314	Even			2:2	312	Even			2:2	448	Even			2:2	328	Even			2:2	260	Even
1:2	192	Uneven			1:2	235	Uneven			2:1	229	Uneven			1:2	293	Uneven			1:2	290	Uneven			1:2	171	Uneven
2:1	90	Uneven			2:1	117	Uneven			1:2	119	Uneven			2:1	154	Uneven			2:1	139	Uneven			2:1	102	Uneven
6:6	70	Even			6:6	70	Even			4:4	65	Even			4:4	94	Even			4:4	70	Even			6:6	66	Even
2:2;1:1	64	Even			4:4	67	Even			6:6	65	Even			2:2;1:1	82	Even			6:6	70	Even			2:2;4:4;1:1	59	Even
4:4	44	Even			2:2;4:4;1:1	59	Even			2:2;4:4;1:1	59	Even			6:6	74	Even			2:2;1:1	61	Even			4:4	57	Even
1:3	28	Uneven			2:2;1:1	51	Even			2:2;1:1	49	Even			2:2;4:4;1:1	59	Even			2:2;4:4;1:1	59	Even			2:2;1:1	37	Even
3:1	26	Uneven			1:3	36	Uneven			1:4	48	Uneven			1:3	43	Uneven			1:3	46	Uneven			1:4	29	Uneven
3:3	17	Even			1:4	35	Uneven			3:1	35	Uneven			1:4	37	Uneven			1:4	37	Uneven			1:3	28	Uneven
2:2;6:6;1:1	15	Even			3:1	26	Uneven			2:4	23	Uneven			3:1	29	Uneven			3:1	30	Uneven			4:1	22	Uneven
2:2;4:4	11	Even			4:1	25	Uneven			1:3	16	Uneven			4:1	28	Uneven			4:1	28	Uneven			2:2;6:6;1:1	21	Even
4:4;1:1	11	Even			2:2;6:6;1:1	21	Even			2:2;6:6;1:1	15	Even			2:2;6:6;1:1	21	Even			2:2;6:6;1:1	21	Even			3:1	16	Uneven
2:2;6:6	10	Even			4:2	16	Uneven			4:1	14	Uneven			4:2	21	Uneven			4:2	19	Uneven			4:2	15	Uneven
2:2;4:4;12:12;3:3;1:1	9	Even			2:4	14	Uneven			3:3	10	Even			3:3	19	Even			2:2;4:4;12:12;3:3;1:1	15	Even			2:4	13	Uneven
4:2	9	Uneven			2:2;4:4;12:12;3:3;1:1	12	Even			2:2;4:4;12:12;3:3;1:1	9	Even			2:4	17	Uneven			2:4	14	Uneven			2:2;4:4;12:12;3:3;1:1	12	Even
2:2;1:1;4:4	8	Even			4:4;1:1	11	Even			4:4;1:1	9	Even			4:4;1:1	13	Even			4:4;1:1	11	Even			2:2;6:6	10	Even
2:2;3:3	8	Even			2:2;6:6	10	Even			4:2	9	Uneven			2:2;4:4	12	Even			2:2;4:4	10	Even			4:4;1:1	10	Even
2:2;4:4;1:1	8	Even			3:3	10	Even			2:2;4:4	7	Even			2:2;4:4;12:12;3:3;1:1	12	Even			2:2;6:6	10	Even			3:3	7	Even
2:4	7	Uneven			1:1;2:2;4:4	7	Even			2:2;6:6	6	Even			2:2;6:6	11	Even			2:2;1:1;4:4	8	Even			2:2;4:4	6	Even
1:1;4:4	6	Even			2:2;1:1;4:4	6	Even			8:8	5	Even			1:1;4:4	9	Even			3:3	8	Even			1:18	6	Uneven
8:8	6	Even			8:8	6	Even			18:1	5	Uneven			2:2;1:1;4:4	9	Even			1:1;2:2;4:4	7	Even			8:8	5	Even
1:18	6	Uneven			1:18	6	Uneven			6:4	5	Uneven			1:1;2:2;4:4	8	Even			1:1;4:4	7	Even			1:1;2:2;4:4	4	Even
1:4	6	Uneven			1:1;4:4	5	Even			1:1;2:2;4:4	4	Even			2:2;3:3	8	Even			1:1;4:4;2:2	6	Even			1:1;4:4;2:2	4	Even
1:1;2:2;4:4	5	Even			1:1;4:4;2:2	5	Even			12:12	4	Even			8:8	8	Even			8:8	6	Even			1:1;4:4	3	Even
12:12	5	Even			2:2;4:4	5	Even			12:12;2:2	4	Even			1:1;4:4;2:2	6	Even			1:18	6	Uneven			4:4;2:2	3	Even
3:2	5	Uneven			4:4;2:2	5	Even			2:2;4:4;12:12;3:3	4	Even			12:12	6	Even			4:4;2:2	5	Even			2:1;4:2	3	Uneven
5:1	5	Uneven			12:12;2:2	4	Even			2:1;4:2	4	Uneven			4:4;2:2	6	Even			12:12	4	Even			3:2	3	Uneven
1:1;3:3;2:2	4	Even			3:2	4	Uneven			1:1;2:2;3:3	3	Even			1:18	6	Uneven			12:12;2:2	4	Even			6:4	3	Uneven
1:1;4:4;2:2	4	Even			6:4	4	Uneven			1:1;4:4	3	Even			3:2	5	Uneven			2:2;4:4;12:12;3:3	4	Even			1:1;2:2;3:3	2	Even
12:12;2:2	4	Even			12:12	3	Even			1:1;4:4;2:2	3	Even			5:1	5	Uneven			6:4	4	Uneven			1:1;2:2;4:4;3:3	2	Even
4:4;2:2	4	Even			4:4;2:2;1:1	3	Even			2:2;1:1;4:4	3	Even			1:1;3:3	4	Even			2:1;4:2	3	Uneven			1:1;3:3	2	Even
1:1;3:3	3	Even			5:5	3	Even			4:4;1:1;2:2	3	Even			1:1;3:3;2:2	4	Even			3:2	3	Uneven			12:12;2:2	2	Even
5:5	3	Even			2:1;4:2	3	Uneven			4:4;2:2	3	Even			10:10	4	Even			1:1;2:2;3:3	2	Even			2:2;1:1;4:4	2	Even
1:2;2:4	3	Uneven			1:1;2:2;3:3	2	Even			5:5	3	Even			12:12;2:2	4	Even			1:1;2:2;4:4;3:3	2	Even			2:2;4:4;12:12;3:3	2	Even
2:1;4:2	3	Uneven			1:1;2:2;4:4;3:3	2	Even			2:3	3	Uneven			1:6	4	Uneven			1:1;3:3	2	Even			3:3;1:1	2	Even
4:1	3	Uneven			1:1;3:3;2:2	2	Even			1:1;3:3	2	Even			2:1;4:2	4	Uneven			1:1;3:3;2:2	2	Even			4:4;2:2;1:1	2	Even
1:1;2:2;4:4;3:3	2	Even			2:2;4:4;12:12;3:3	2	Even			1:1;3:3;2:2	2	Even			6:4	4	Uneven			3:3;1:1	2	Even			4:4;6:6	2	Even
3:3;2:2;1:1	2	Even			3:3;1:1	2	Even			2:2;3:3	2	Even			1:1;2:2;3:3	3	Even			3:3;2:2	2	Even			14:5	2	Uneven
4:4;1:1;2:2	2	Even			3:3;2:2	2	Even			3:3;1:1	2	Even			4:4;1:1;2:2	3	Even			3:3;2:2;1:1	2	Even			6:18	2	Uneven
4:4;6:6	2	Even			3:3;2:2;1:1	2	Even			3:3;2:2	2	Even			4:4;2:2;1:1	3	Even			4:4;1:1;2:2	2	Even			6:2	2	Uneven
1:6	2	Uneven			4:4;1:1;2:2	2	Even			3:3;2:2;1:1	2	Even			5:5	3	Even			4:4;2:2;1:1	2	Even			1:1;18:18	1	Even
14:1	2	Uneven			4:4;6:6	2	Even			4:4;2:2;1:1	2	Even			1:2;2:4	3	Uneven			4:4;6:6	2	Even			1:1;18:18;3:3;2:2	1	Even
14:5	2	Uneven			14:5	2	Uneven			1:10	2	Uneven			2:3	3	Uneven			5:5	2	Even			1:1;2:2;3:3;8:8;4:4	1	Even
2:3	2	Uneven			2:3	2	Uneven			1:2;2:4	2	Uneven			1:1;2:2;4:4;3:3	2	Even			1:2;2:4	2	Uneven			1:1;2:2;4:4;12:12;3:3	1	Even
2:6	2	Uneven			6:18	2	Uneven			14:5	2	Uneven			2:2;4:4;12:12;3:3	2	Even			14:5	2	Uneven			1:1;2:2;4:4;14:14;6:6;3:3;20:20	1	Even
5:2	2	Uneven			6:2	2	Uneven			18:6	2	Uneven			3:3;1:1	2	Even			2:6	2	Uneven			1:1;3:3;2:2	1	Even
6:1	2	Uneven			8:5	2	Uneven			3:2	2	Uneven			3:3;2:2	2	Even			5:1	2	Uneven			1:1;5:5	1	Even
6:18	2	Uneven			1:1;18:18;3:3;2:2	1	Even			5:2	2	Uneven			3:3;2:2;1:1	2	Even			5:2	2	Uneven			12:12	1	Even
8:5	2	Uneven			1:1;2:2;3:3;8:8;4:4	1	Even			6:2	2	Uneven			4:4;6:6	2	Even			6:18	2	Uneven			12:12;2:2;1:1	1	Even
1:1;12:12	1	Even			1:1;2:2;4:4;12:12;3:3	1	Even			1:1;18:18;3:3;2:2	1	Even			14:1	2	Uneven			6:2	2	Uneven			14:14	1	Even
1:1;18:18	1	Even			1:1;2:2;4:4;14:14;6:6;3:3;20:20	1	Even			1:1;2:2;4:4;12:12;3:3	1	Even			14:5	2	Uneven			1:1;18:18;3:3;2:2	1	Even			2:2;1:1;4:4;3:3	1	Even
1:1;18:18;3:3;2:2	1	Even			1:1;3:3	1	Even			1:1;2:2;4:4;3:3	1	Even			2:6	2	Uneven			1:1;2:2;3:3;8:8;4:4	1	Even			2:2;12:12	1	Even
1:1;2:2;3:3	1	Even			1:1;4:4;5:5	1	Even			1:1;2:2;8:8	1	Even			5:2	2	Uneven			1:1;2:2;4:4;12:12;3:3	1	Even			2:2;14:14	1	Even
1:1;2:2;3:3;8:8;4:4	1	Even			1:1;5:5	1	Even			1:1;4:4;5:5	1	Even			6:1	2	Uneven			1:1;2:2;4:4;14:14;6:6;3:3;20:20	1	Even			2:2;3:3	1	Even
1:1;2:2;4:4;12:12;3:3	1	Even			1:1;7:7	1	Even			1:1;5:5	1	Even			6:18	2	Uneven			1:1;4:4;5:5	1	Even			2:2;4:4;6:6	1	Even
1:1;2:2;4:4;14:14;6:6;3:3;20:20	1	Even			12:12;2:2;1:1	1	Even			1:1;7:7	1	Even			6:2	2	Uneven			1:1;5:5	1	Even			2:2;4:4;8:8	1	Even
1:1;2:2;8:8	1	Even			14:14	1	Even			12:12;2:2;1:1	1	Even			8:5	2	Uneven			1:1;7:7	1	Even			3:3;2:2	1	Even
1:1;4:4;5:5	1	Even			2:2;1:1;4:4;3:3	1	Even			14:14	1	Even			1:1;12:12	1	Even			12:12;2:2;1:1	1	Even			34:34;36:36	1	Even
1:1;5:5	1	Even			2:2;12:12	1	Even			2:2;1:1;4:4;3:3	1	Even			1:1;18:18	1	Even			14:14	1	Even			4:4;1:1;2:2	1	Even
1:1;8:8	1	Even			2:2;14:14	1	Even			2:2;12:12	1	Even			1:1;18:18;3:3;2:2	1	Even			2:2;1:1;4:4;3:3	1	Even			4:4;12:12	1	Even
10:10	1	Even			2:2;3:3	1	Even			2:2;14:14	1	Even			1:1;2:2;3:3;8:8;4:4	1	Even			2:2;12:12	1	Even			4:4;5:5	1	Even
12:12;2:2;1:1	1	Even			2:2;4:4;6:6	1	Even			2:2;4:4;6:6	1	Even			1:1;2:2;4:4;12:12;3:3	1	Even			2:2;14:14	1	Even			5:5	1	Even
14:14	1	Even			2:2;4:4;8:8	1	Even			2:2;4:4;8:8	1	Even			1:1;2:2;4:4;14:14;6:6;3:3;20:20	1	Even			2:2;3:3	1	Even			6:6;1:1	1	Even
2:2;1:1;4:4;3:3	1	Even			34:34;36:36	1	Even			34:34;36:36	1	Even			1:1;2:2;8:8	1	Even			2:2;4:4;6:6	1	Even			6:6;8:8;2:2	1	Even
2:2;12:12	1	Even			4:4;12:12	1	Even			4:4;12:12	1	Even			1:1;4:4;5:5	1	Even			2:2;4:4;8:8	1	Even			1:2;2:4	1	Uneven
2:2;14:14	1	Even			4:4;5:5	1	Even			4:4;5:5	1	Even			1:1;5:5	1	Even			34:34;36:36	1	Even			10:5	1	Uneven
2:2;3:3;12:12;8:8;4:4	1	Even			6:6;1:1	1	Even			5:5;1:1	1	Even			1:1;7:7	1	Even			4:4;12:12	1	Even			2:3	1	Uneven
2:2;4:4;6:6	1	Even			6:6;1:1;2:2	1	Even			6:6;1:1	1	Even			1:1;8:8	1	Even			4:4;5:5	1	Even			24:2	1	Uneven
3:3;1:1	1	Even			6:6;3:3	1	Even			6:6;2:2;4:4;12:12;3:3;1:1	1	Even			12:12;2:2;1:1	1	Even			5:5;1:1	1	Even			4:6	1	Uneven
3:3;12:12;1:1	1	Even			6:6;8:8;2:2	1	Even			6:6;8:8;2:2	1	Even			14:14	1	Even			6:6;1:1	1	Even			5:1	1	Uneven
3:3;2:2	1	Even			1:2;2:4	1	Uneven			8:8;4:4	1	Even			2:2;1:1;4:4;3:3	1	Even			6:6;2:2;4:4;12:12;3:3;1:1	1	Even			6:9	1	Uneven
34:34;36:36	1	Even			1:6	1	Uneven			1:18	1	Uneven			2:2;1:1;8:8	1	Even			6:6;8:8;2:2	1	Even			8:16;1:2	1	Uneven
4:4;12:12	1	Even			10:5	1	Uneven			14:2	1	Uneven			2:2;12:12	1	Even			1:6	1	Uneven			8:7	1	Uneven
4:4;2:2;1:1	1	Even			2:6	1	Uneven			16:8;2:1	1	Uneven			2:2;14:14	1	Even			10:5	1	Uneven			9:3;3:1	1	Uneven
4:4;5:5	1	Even			24:2	1	Uneven			2:24	1	Uneven			2:2;3:3;12:12;8:8;4:4	1	Even			14:1	1	Uneven			2:1;2:2;1:1	238	Changes
5:5;1:1	1	Even			4:6	1	Uneven			2:4;1:2	1	Uneven			2:2;4:4;6:6	1	Even			14:2	1	Uneven			1:2;2:2	234	Changes
6:6;1:1	1	Even			5:1	1	Uneven			5:1	1	Uneven			2:2;4:4;8:8	1	Even			2:3	1	Uneven			1:2;1:3;1:4	114	Changes
6:6;8:8;2:2	1	Even			6:9	1	Uneven			5:10	1	Uneven			3:3;12:12;1:1	1	Even			2:4;1:2	1	Uneven			2:1;2:2	46	Changes
8:8;4:4	1	Even			8:16;1:2	1	Uneven			9:3;3:1	1	Uneven			34:34;36:36	1	Even			24:2	1	Uneven			1:3;1:2;1:4	30	Changes
8:8;4:4;2:2	1	Even			8:7	1	Uneven			1:2;2:2	174	Changes			4:4;12:12	1	Even			4:6	1	Uneven			1:1;1:2	26	Changes
10:5	1	Uneven			9:3;3:1	1	Uneven			2:1;2:2;1:1	149	Changes			4:4;5:5	1	Even			8:16;1:2	1	Uneven			2:2;4:4;1:1;1:2	25	Changes
14:2	1	Uneven			1:2;2:2	283	Changes			2:1;3:1;4:1	102	Changes			4:4;6:6;2:2;10:10;20:20;1:1	1	Even			8:7	1	Uneven			1:1;2:1;4:2	21	Changes
2:4;1:2	1	Uneven			2:1;2:2;1:1	238	Changes			2:1;2:2	97	Changes			5:5;1:1	1	Even			9:3;3:1	1	Uneven			1:1;1:2;2:4	12	Changes
24:2	1	Uneven			1:2;1:3;1:4	138	Changes			1:2;2:2;1:1	89	Changes			6:6;1:1	1	Even			1:2;2:2	249	Changes			1:1;2:1	12	Changes
6:12	1	Uneven			2:1;2:2	48	Changes			1:2;1:3;1:4	42	Changes			6:6;1:1;2:2	1	Even			2:1;2:2;1:1	238	Changes			2:2;4:4;1:1;2:1	8	Changes
6:2	1	Uneven			1:1;1:2	30	Changes			1:1;1:2	39	Changes			6:6;3:3	1	Even			1:2;1:3;1:4	153	Changes			2:2;4:2	7	Changes
8:16;1:2	1	Uneven			1:3;1:2;1:4	30	Changes			1:1;2:1;4:2	35	Changes			6:6;8:8;2:2	1	Even			2:1;2:2	49	Changes			1:2;1:3;2:2	6	Changes
8:4	1	Uneven			2:2;4:4;1:1;1:2	25	Changes			2:2;4:4;1:1;1:2	22	Changes			8:8;2:2;1:1	1	Even			1:1;1:2	39	Changes			1:2;1:4	6	Changes
8:7	1	Uneven			1:1;2:1;4:2	23	Changes			3:1;2:1;4:1	20	Changes			8:8;4:4	1	Even			1:3;1:2;1:4	35	Changes			2:1;3:1;4:1	6	Changes
9:3;3:1	1	Uneven			2:1;3:1;4:1	18	Changes			1:1;2:1	19	Changes			8:8;4:4;2:2	1	Even			2:2;4:4;1:1;1:2	25	Changes			2:2;1:4	6	Changes
1:2;2:2	247	Changes			1:1;2:1	16	Changes			2:2;4:4;1:1;2:1	11	Changes			10:5	1	Uneven			1:1;2:1;4:2	23	Changes			2:2;4:4;1:4	6	Changes
1:2;1:3;1:4	105	Changes			1:1;1:2;2:4	12	Changes			1:3;1:2;1:4	10	Changes			14:2	1	Uneven			2:1;3:1;4:1	22	Changes			4:4;1:4	6	Changes
2:1;2:2	45	Changes			1:2;1:4	12	Changes			2:1;1:1	7	Changes			2:4;1:2	1	Uneven			1:1;2:1	21	Changes			1:1;2:2;2:1;1:2	5	Changes
1:1;1:2	35	Changes			2:2;4:2	8	Changes			2:2;4:2	7	Changes			24:2	1	Uneven			1:2;1:4	14	Changes			2:2;2:1	3	Changes
1:1;2:1	24	Changes			2:2;4:4;1:1;2:1	8	Changes			2:1;3:1;2:2	6	Changes			4:6	1	Uneven			1:1;1:2;2:4	12	Changes			4:4;2:4	3	Changes
2:1;2:2;1:1	24	Changes			1:2;1:3;2:2	6	Changes			2:1;4:1	6	Changes			6:12	1	Uneven			2:1;1:1	8	Changes			4:4;1:1;2:1	2	Changes
1:1;2:1;4:2	22	Changes			2:2;1:4	6	Changes			1:1;2:2;2:1;1:2	5	Changes			6:9	1	Uneven			2:2;4:4;1:1;2:1	8	Changes			4:4;2:1	2	Changes
1:3;1:2;1:4	20	Changes			2:2;4:4;1:4	6	Changes			2:2;1:4	5	Changes			8:16;1:2	1	Uneven			1:2;1:3;2:2	7	Changes			1:1;1:8;7:8	1	Changes
2:1;3:1;4:1	15	Changes			4:4;1:4	6	Changes			2:2;4:4;1:4	5	Changes			8:4	1	Uneven			2:2;1:4	7	Changes			1:1;2:1;2:2	1	Changes
1:1;1:2;2:4	13	Changes			1:1;2:2;2:1;1:2	5	Changes			4:4;1:4	5	Changes			8:7	1	Uneven			2:2;4:2	7	Changes			1:1;2:1;3:3;2:2	1	Changes
1:2;1:4	10	Changes			2:1;1:1	5	Changes			1:1;2:2;1:2	3	Changes			9:3;3:1	1	Uneven			2:2;4:4;1:4	7	Changes			1:1;2:2;1:2;2:1	1	Changes
2:2;4:2	8	Changes			2:2;2:1	4	Changes			1:2;1:1	3	Changes			1:2;2:2	304	Changes			4:4;1:4	6	Changes			1:1;2:4	1	Changes
1:1;2:2;2:1;1:2	5	Changes			4:4;2:4	4	Changes			2:2;2:1	3	Changes			2:1;2:2;1:1	238	Changes			1:1;2:2;2:1;1:2	5	Changes			1:1;4:4;2:2;6:6;3:3;1:2	1	Changes
1:2;1:3;2:2	5	Changes			1:1;2:2;2:1	3	Changes			4:4;1:1;1:2	3	Changes			1:2;1:3;1:4	138	Changes			1:2;1:1	5	Changes			1:2;1:1	1	Changes
2:2;1:4	5	Changes			1:2;1:1	3	Changes			4:4;4:2	3	Changes			1:1;1:2	71	Changes			2:2;2:1	5	Changes			2:2;1:1;1:2	1	Changes
4:4;1:4	5	Changes			4:4;2:1	3	Changes			1:8;1:10	2	Changes			2:1;2:2	55	Changes			4:4;2:4	4	Changes			2:2;1:1;4:4;1:2	1	Changes
2:1;1:1	4	Changes			4:2;2:2	2	Changes			2:2;4:4;1:1;1:2;2:1	2	Changes			1:1;2:1	36	Changes			1:1;2:2;2:1	3	Changes			2:2;2:4	1	Changes
2:2;2:1	4	Changes			1:1;1:2;3:6;2:4	1	Changes			4:4;1:1;2:2;2:1	2	Changes			1:3;1:2;1:4	30	Changes			4:4;2:1	3	Changes			2:2;2:4;4:4	1	Changes
1:1;2:2;2:1	3	Changes			1:1;1:8;7:8	1	Changes			4:4;2:1	2	Changes			2:2;4:4;1:1;1:2	25	Changes			4:2;2:2	2	Changes			2:2;4:2;4:4	1	Changes
4:4;2:1	3	Changes			1:1;2:1;2:2	1	Changes			1:1;1:2;2:4	1	Changes			1:1;2:1;4:2	24	Changes			4:4;1:1;2:1	2	Changes			2:2;4:4;1:1;1:2;2:1	1	Changes
1:1;2:1;2:2	2	Changes			1:1;2:1;3:3;2:2	1	Changes			1:1;1:8;7:8	1	Changes			2:1;3:1;4:1	18	Changes			1:1;1:2;3:6;2:4	1	Changes			2:2;4:4;1:1;2:1;1:2	1	Changes
4:4;2:4	2	Changes			1:1;2:2;1:2;2:1	1	Changes			1:1;2:1;2:2	1	Changes			1:1;1:2;2:4	13	Changes			1:1;1:8;7:8	1	Changes			2:2;4:4;16:16;2:4;1:1	1	Changes
1:1;2:1;3:3;2:2	1	Changes			1:1;2:4	1	Changes			1:1;2:1;3:3;2:2	1	Changes			1:2;1:4	12	Changes			1:1;2:1;2:2	1	Changes			2:3;2:4	1	Changes
1:1;2:2;1:2;2:1	1	Changes			1:1;4:4;2:2;4:3;4:1;2:4;12:12;4:2;6:6;3:4;1:4;3:1;3:3;1:3	1	Changes			1:1;2:2;1:2;2:1	1	Changes			2:1;1:1	10	Changes			1:1;2:1;3:3;2:2	1	Changes			2:4;4:6	1	Changes
1:1;2:4	1	Changes			1:1;4:4;2:2;6:6;3:3;1:2	1	Changes			1:1;2:4	1	Changes			2:2;4:2	9	Changes			1:1;2:2;1:2;2:1	1	Changes			3:2;2:2	1	Changes
1:1;4:4;1:4;3:4;2:4;2:2;4:1;4:3	1	Changes			1:2;1:1;2:2	1	Changes			1:1;4:4;2:2;3:4;1:4;4:2;12:12;2:4;6:6;4:3;4:1;3:1;3:3;1:3	1	Changes			1:2;1:1	8	Changes			1:1;2:4	1	Changes			3:3;1:3	1	Changes
1:1;4:4;2:2;4:3;4:1;2:4;12:12;4:2;6:6;3:4;1:4;3:1;3:3;1:3	1	Changes			2:2;1:1;1:2	1	Changes			1:1;7:4;3:3;6:5;7:5	1	Changes			2:2;4:4;1:1;2:1	8	Changes			1:1;4:4;2:2;4:3;4:1;2:4;12:12;4:2;6:6;3:4;1:4;3:1;3:3;1:3	1	Changes			4:1;4:2	1	Changes
1:1;4:4;2:2;6:6;3:3;1:2	1	Changes			2:2;2:1;1:1	1	Changes			1:2;2:4;1:1	1	Changes			1:2;1:3;2:2	6	Changes			1:1;4:4;2:2;6:6;3:3;1:2	1	Changes			4:4;1:2	1	Changes
1:1;4:4;2:4;2:2;3:3;3:1;1:3;1:4;3:4	1	Changes			2:2;2:4	1	Changes			2:2;1:1;1:2	1	Changes			2:2;1:4	6	Changes			2:1;2:2;3:3	1	Changes			4:4;1:2;2:2	1	Changes
1:1;7:4;3:3;6:5;7:5	1	Changes			2:2;2:4;4:4	1	Changes			2:2;1:2	1	Changes			2:2;4:4;1:4	6	Changes			2:2;1:1;1:2	1	Changes			4:4;2:1;2:2	1	Changes
1:2;1:1	1	Changes			2:2;4:2;4:4	1	Changes			2:2;2:4;4:4	1	Changes			4:4;1:4	6	Changes			2:2;1:1;1:2;2:1	1	Changes			4:4;3:1;2:2	1	Changes
1:2;1:1;2:2	1	Changes			2:2;4:4;1:1;1:2;2:1	1	Changes			2:2;4:1	1	Changes			1:1;2:2;2:1;1:2	5	Changes			2:2;1:1;1:3	1	Changes			5:5;2:4	1	Changes
1:3;1:2	1	Changes			2:2;4:4;1:1;2:1;1:2	1	Changes			2:2;4:2;4:4	1	Changes			2:2;2:1	5	Changes			2:2;2:1;1:1	1	Changes			6:4;6:2	1	Changes
2:1;4:2;1:1	1	Changes			2:2;4:4;16:16;2:4;1:1	1	Changes			2:2;4:4;16:16;2:4;1:1	1	Changes			4:4;2:4	5	Changes			2:2;2:4	1	Changes			8:8;8:1;8:7	1	Changes
2:2;1:1;1:2	1	Changes			2:3;2:4	1	Changes			2:2;4:4;4:1	1	Changes			4:4;2:1	4	Changes			2:2;2:4;4:4	1	Changes
2:2;1:1;1:2;2:1	1	Changes			2:4;4:6	1	Changes			2:4;2:2	1	Changes			1:1;2:2;2:1	3	Changes			2:2;4:2;4:4	1	Changes
2:2;1:1;1:3	1	Changes			3:2;2:2	1	Changes			3:2;2:2	1	Changes			1:1;1:2;3:6;2:4	2	Changes			2:2;4:4;1:1;1:2;2:1	1	Changes
2:2;1:1;4:4;1:2	1	Changes			3:3;1:3	1	Changes			3:2;4:2	1	Changes			2:2;1:2	2	Changes			2:2;4:4;1:1;2:1;1:2	1	Changes
2:2;1:2	1	Changes			4:1;4:2	1	Changes			3:3;3:1	1	Changes			4:2;2:2	2	Changes			2:2;4:4;1:3	1	Changes
2:2;2:1;1:1	1	Changes			4:4;1:1;1:2	1	Changes			4:1;4:2	1	Changes			4:4;1:1;2:1	2	Changes			2:2;4:4;16:16;2:4;1:1	1	Changes
2:2;2:4	1	Changes			4:4;1:1;2:1	1	Changes			4:2;2:2	1	Changes			1:1;1:2;2:2;4:2	1	Changes			2:3;2:4	1	Changes
2:2;2:4;4:4	1	Changes			4:4;1:1;2:2;1:2	1	Changes			4:2;6:4	1	Changes			1:1;1:8;7:8	1	Changes			2:4;4:6	1	Changes
2:2;4:2;4:4	1	Changes			4:4;1:2	1	Changes			4:4;1:2	1	Changes			1:1;2:1;2:2	1	Changes			3:2;2:2	1	Changes
2:2;4:4;1:3	1	Changes			4:4;1:2;2:2	1	Changes			4:4;1:2;2:2	1	Changes			1:1;2:1;3:3;2:2	1	Changes			3:3;1:3	1	Changes
2:2;4:4;16:16;2:4;1:1	1	Changes			4:4;2:1;2:2	1	Changes			4:4;1:3;2:2	1	Changes			1:1;2:2;1:2;2:1	1	Changes			4:1;4:2	1	Changes
2:4;4:6	1	Changes			4:4;3:1;2:2	1	Changes			4:4;2:1;2:2	1	Changes			1:1;2:4	1	Changes			4:4;1:1;2:2;1:2	1	Changes
3:2;2:2	1	Changes			5:5;2:4	1	Changes			4:4;2:4	1	Changes			1:1;4:4;1:4;3:4;2:4;2:2;4:1;4:3	1	Changes			4:4;1:2	1	Changes
3:3;1:3	1	Changes			6:4;6:2	1	Changes			4:4;4:1	1	Changes			1:1;4:4;2:2;4:3;4:1;2:4;12:12;4:2;6:6;3:4;1:4;3:1;3:3;1:3	1	Changes			4:4;3:1;2:2	1	Changes
4:2;2:1;1:1;2:2	1	Changes			8:8;8:1;8:7	1	Changes			5:5;2:4	1	Changes			1:1;4:4;2:2;6:6;3:3;1:2	1	Changes			4:4;4:1	1	Changes
4:2;2:2	1	Changes			8:8;8:4	1	Changes			6:4;6:2	1	Changes			1:1;4:4;2:4;2:2;3:3;3:1;1:3;1:4;3:4	1	Changes			4:6;2:2	1	Changes
4:4;1:1;2:2;1:2	1	Changes								6:6;1:1;1:2;2:2	1	Changes			1:1;7:4;3:3;6:5;7:5	1	Changes			5:5;2:4	1	Changes
4:4;1:1;2:2;2:1	1	Changes								8:8;8:1;8:7	1	Changes			1:2;1:1;2:2	1	Changes			6:4;6:2	1	Changes
4:4;1:2	1	Changes													1:3;1:2	1	Changes			6:6;1:1;1:2;2:2	1	Changes
4:4;1:3;2:2	1	Changes													2:1;2:2;3:3	1	Changes			8:8;8:1;8:7	1	Changes
4:4;2:1;3:3;1:1	1	Changes													2:1;4:2;1:1	1	Changes			8:8;8:4	1	Changes
4:4;2:2;2:3	1	Changes													2:2;1:1;1:2	1	Changes
4:6;2:2	1	Changes													2:2;1:1;1:2;2:1	1	Changes
5:5;2:4	1	Changes													2:2;1:1;1:3	1	Changes
8:8;8:1;8:7	1	Changes													2:2;1:1;4:4;1:2	1	Changes
8:8;8:4	1	Changes													2:2;1:3	1	Changes
															2:2;2:1;1:1	1	Changes
															2:2;2:4	1	Changes
															2:2;2:4;4:4	1	Changes
															2:2;4:2;4:4	1	Changes
															2:2;4:4;1:1;1:2;2:1	1	Changes
															2:2;4:4;1:1;2:1;1:2	1	Changes
															2:2;4:4;1:3	1	Changes
															2:2;4:4;16:16;2:4;1:1	1	Changes
															2:3;2:4	1	Changes
															2:4;4:6	1	Changes
															3:2;2:2	1	Changes
															3:3;1:3	1	Changes
															4:1;4:2	1	Changes
															4:2;2:1;1:1;2:2	1	Changes
															4:4;1:1;1:2	1	Changes
															4:4;1:1;2:2;1:2	1	Changes
															4:4;1:1;2:2;2:1	1	Changes
															4:4;1:2	1	Changes
															4:4;1:2;2:2	1	Changes
															4:4;1:3;2:2	1	Changes
															4:4;2:1;2:2	1	Changes
															4:4;2:1;3:3;1:1	1	Changes
															4:4;2:2;2:3	1	Changes
															4:4;3:1;2:2	1	Changes
															4:6;2:2	1	Changes
															5:5;2:4	1	Changes
															5:6;5:5;6:6	1	Changes
															6:4;6:2	1	Changes
															6:6;1:1;1:2;2:2	1	Changes
															8:8;8:1;8:7	1	Changes
															8:8;8:4	1	Changes
